# Supplementary material
Source: bioRxiv or medRxiv preprint supplement (https://medrxiv.org/highwire/filestream/74400/field_highwire_adjunct_files/0/2020.03.22.20040832-1.pdf)
Supplement: Supplementary file [file 2020.03.22.20040832-1.pdf]

## Online supplement

### **Factors associated with prolonged viral shedding and impact of Lopinavir/Ritonavir treatment in patients with SARS-CoV-2 infection**

**Yan Dan<sup>1</sup>, MSc.; Xiao-Yan Liu<sup>1</sup>, MSc.; Ya-nan Zhu<sup>2</sup>, MSc.; Li Huang<sup>2</sup>, MSc.; Bi-tang Dan<sup>1</sup>, MSc.; Guo-jun Zhang<sup>3</sup>, PhD; Yong-hua Gao<sup>3</sup>, PhD**

<sup>1</sup>Department of Neurology, Hubei NO.3 People's Hospital of Jiangnan University, Wuhan, Hubei, China

<sup>2</sup>Department of Internal Emergency Medicine, The First Affiliated Hospital of Zhengzhou University, Zhengzhou, Henan, China

<sup>3</sup>Department of Respiratory and Critical Care Medicine, The First Affiliated Hospital of Zhengzhou University, Zhengzhou, Henan, China

Corresponding author: Dr Yong-hua Gao, Department of Respiratory and Critical Care Medicine, The First Affiliated Hospital of Zhengzhou University, Zhengzhou, Henan, China. Email: [gaoyonghuahust@163.com](mailto:gaoyonghuahust@163.com)

**Take home message:** Risk factors for prolonged viral shedding included older age and lack of Lopinavir/Ritonavir treatment. Earlier administration of Lopinavir/Ritonavir treatment could shorten the duration of SARS-CoV-2 RNA shedding.

**Table E1. Clinical features in patients with prolonged SARS-CoV-2 detection in Wuhan**

| Characteristic                                    | Days to negativity |              | P value |
|---------------------------------------------------|--------------------|--------------|---------|
|                                                   | ≤23 d, n= 61       | >23 d, n= 59 |         |
| <b>Age, Y</b>                                     | 48 (33-60)         | 56 (42-65)   | 0.04    |
| <b>Male sex</b>                                   | 30 (49.2)          | 24 (40.7)    | 0.35    |
| <b>Comorbidity</b>                                |                    |              |         |
| Hypertension                                      | 19 (31.1)          | 13 (22.0)    | 0.26    |
| Diabetes                                          | 3 (4.9)            | 7 (11.9)     | 0.20    |
| Cardiac disease <sup>a</sup>                      | 3 (4.9)            | 4 (6.8)      | 0.72    |
| Stroke                                            | 1 (1.6)            | 2 (3.4)      | 0.62    |
| COPD or asthma                                    | 2 (3.2)            | 0 (0)        | ...     |
| Malignancy                                        | 4 (6.6)            | 3 (5.1)      | 0.73    |
| <b>Disease severity</b>                           |                    |              | 0.36    |
| General                                           | 48 (78.7)          | 41 (69.5)    |         |
| Severe                                            | 13 (21.3)          | 17 (28.8)    |         |
| Critical                                          | 0 (0)              | 1 (1.7)      |         |
| <b>Laboratory finding on admission</b>            |                    |              |         |
| White blood cell count, × 10 <sup>9</sup> cells/L |                    |              | 0.57    |
| <4                                                | 16 (26.7)          | 11 (18.6)    |         |
| 4-10                                              | 39 (65)            | 43 (72.9)    |         |
| >10                                               | 5 (8.3)            | 5 (8.5)      |         |
| Lymphocyte count, × 10 <sup>9</sup> lymphocytes/L |                    |              |         |
| <0.8                                              | 18 (62.1)          | 11 (37.9)    | 0.15    |
| Platelet count, × 10 <sup>9</sup> platelets/L     |                    |              |         |
| <100                                              | 5 (4.2)            | 2 (1.%)      | 0.44    |
| Creatinine level, μmol/L                          |                    |              |         |
| >133                                              | 0 (0)              | 4 (3.4%)     | ...     |
| AST level, U/L                                    |                    |              |         |
| >40                                               | 14 (11.8)          | 19 (16.0)    | 0.18    |
| <b>Treatment</b>                                  |                    |              |         |
| Corticosteroid therapy                            | 28 (45.9)          | 26 (44.1)    | 0.78    |
| Lopinavir/Ritonavir treatment                     | 46 (75.4)          | 33 (55.9)    | 0.02    |
| Antibiotics                                       | 52 (85.2)          | 50 (84.7)    | 0.77    |
| High-flow nasal canula oxygen therapy             | 10 (16.4)          | 11 (18.6)    | 0.88    |
| No-invasive mechanical ventilation                | 0 (0)              | 2 (3.4)      | ...     |
| Invasive mechanical ventilation                   | 0 (0)              | 1 (1.7)      | ...     |
| <b>Outcome</b>                                    |                    |              |         |
| viral shedding duration, d                        | 18 (15-20.5)       | 32 (28-38)   | <0.001  |
| Hospital length of stay, d                        | 20 (15-24)         | 22 (18-28)   | 0.02    |

Abbreviations: AST=aspartate aminotransferase; COPD=chronic obstructive pulmonary disease; d=day  
IQR=interquartile range.

Data presented as n (%) or median (IQR) unless otherwise noted.

<sup>a</sup>includes congestive heart disease and coronary atherosclerotic heart disease.
